# Supplementary material
Source: PubMed Central journal article supplement (PMC4981528)
Supplement: NIHMS794613-supplement-Supp_Info.pdf [file NIHMS794613-supplement-Supp_Info.pdf]

# Efficient Implementation of Constant pH Molecular Dynamics on Modern Graphics Processors

Evan J. Arthur<sup>1</sup> and Charles L. Brooks III<sup>2</sup>

## Content

Table SI-1. Computer specifications used to benchmark the new GPU-enabled CPHMD algorithm.

| part           | description                          | notes                                |
|----------------|--------------------------------------|--------------------------------------|
| main processor | 2 x Intel Xeon E5-2620               | 2.0GHz, 6 cores each, 12 cores total |
| GPU            | GeForce GTX 780 Ti                   | 875 MHz, 2880 cores, 3.1 GB memory   |
| motherboard    | ATX Server Motherboard Dual LGA 2011 | DDR3 1600 MHz                        |
| power supply   | CORSAIR AX1200i                      | 1200W                                |
| RAM            | 8 x 4GB Ripjaws Z Series DDR3        | 240-Pin, 1600 MHz, 32GB total        |
| hard drive     | Crucial M500 480GB SATA              | 480GB of storage                     |
| heatsink       | 2 x Supermicro SNK-P0050AP4          |                                      |

---

<sup>1</sup> Department of Chemistry, University of Michigan, 930 N. University Ave, Ann Arbor, MI 48109

<sup>2</sup> Department of Chemistry and Biophysics Program, University of Michigan, 930 N. University Ave, Ann Arbor, MI 48109
